# Supplementary material for: Circulating Levels of Cathelicidin Antimicrobial Peptide (CAMP) Are Affected by Oral Lipid Ingestion
Source: Nutrients. 2023 Jul 3;15(13):3021. doi: 10.3390/nu15133021 (PMC10347133; doi:10.3390/nu15133021)
Supplement: Supplementary file 1 [file nutrients-15-03021-s001.zip › nutrients-2445130-supplementary.pdf]

|                                |                             |
|--------------------------------|-----------------------------|
| <b>A) men (n=30)</b>           | <b>Study cohort (t = 0)</b> |
| Age [y]                        | 27.47±7.59 [18-54]          |
| BMI [kg/m <sup>2</sup> ]       | 25.11±3.43 [19.9-34.6]      |
| WHR                            | 0.88±0.09 [0.75-1.07]       |
| HOMA Index                     | 1.51±0.93 [0.42-3.78]       |
| Glucose [mg/dL]                | 73-73±12.01 [44-92]         |
| Total cholesterol [mg/dL]      | 184.00±40.52 [111-297]      |
| Triglycerides [mg/dL]          | 122.80±47.62 [51-254]       |
| HDL cholesterol [mg/dL]        | 50.60±9.33 [31-69]          |
| LDL cholesterol [mg/dL]        | 113.93±33.54 [51-196]       |
| CAMP [ng/mL]                   | 67.29±27.42 [18.18-146.24]  |
| <b>B) women (n=50)</b>         | <b>Study cohort (t = 0)</b> |
| Age [y]                        | 28.80±7.53 [21-49]          |
| BMI [kg/m <sup>2</sup> ]       | 23.73±5.79 [14.8-46.1]      |
| WHR                            | 0.81±0.08 [0.69-0.98]       |
| HOMA Index                     | 1.84±1.65 [0.18-8.47]       |
| Glucose [mg/dL]                | 74.94±14.72 [19-110]        |
| Total cholesterol [mg/dL]      | 194.50±36.27 [52-277]       |
| Triglycerides [mg/dL]          | 115.72±48.46 [24-299]       |
| HDL cholesterol [mg/dL]        | 66.66±18.46 [23-107]        |
| LDL cholesterol [mg/dL]        | 107.96±30.06 [26-174]       |
| CAMP [ng/mL]                   | 48.88±28.39 [10.77-131.33]  |
| <b>C) normal weight (n=52)</b> | <b>Study cohort (t = 0)</b> |
| Gender (men/women)             | 15/37                       |
| Age [y]                        | 26.87±6.50 [18-49]          |
| BMI [kg/m <sup>2</sup> ]       | 21.61±2.19 [14.8-24.9]      |
| WHR                            | 0.80±0.07 [0.69-0.93]       |
| HOMA Index                     | 1.32±0.71 [0.18-3.95]       |
| Glucose [mg/dL]                | 73.65±12.70 [19-93]         |
| Total cholesterol [mg/dL]      | 180.75±33.69 [52-255]       |
| Triglycerides [mg/dL]          | 106.71±37.43 [24-184]       |
| HDL cholesterol [mg/dL]        | 61.96±18.77 [23-107]        |
| LDL cholesterol [mg/dL]        | 99.79±27.07 [26-147]        |
| CAMP [ng/mL]                   | 55.45±28.12 [10.77-131.33]  |
| <b>D) overweight (n=28)</b>    | <b>Study cohort (t = 0)</b> |
| Gender (men/women)             | 15/13                       |
| Age [y]                        | 30.96±8.66 [22-54]          |
| BMI [kg/m <sup>2</sup> ]       | 29.15±5.24 [25.0-46.1]      |
| WHR                            | 0.90±0.08 [0.74-1.07]       |
| HOMA Index                     | 2.45±2.03 [0.56-8.47]       |
| Glucose [mg/dL]                | 76.04±15.59 [45-110]        |
| Total cholesterol [mg/dL]      | 208.79±39.42 [145-297]      |
| Triglycerides [mg/dL]          | 140.04±58.28 [57-299]       |
| HDL cholesterol [mg/dL]        | 58.18±14.70 [37-93]         |
| LDL cholesterol [mg/dL]        | 129.54±29.86 [72-196]       |
| CAMP [ng/mL]                   | 56.41±31.81 [15.87-146.24]  |

**Supplementary Table S1: Study cohort**

Basic characteristics of the study cohort are presented with mean ± standard deviation and [range]. Patients were divided in subgroups: A) men; B) women; C) BMI < 25kg/m<sup>2</sup>; D) BMI ≥ 25kg/m<sup>2</sup>. The investigated 80 volunteers are part of a larger cohort published earlier [19]. t = 0, base-line characteristics (prior to oral lipid ingestion)

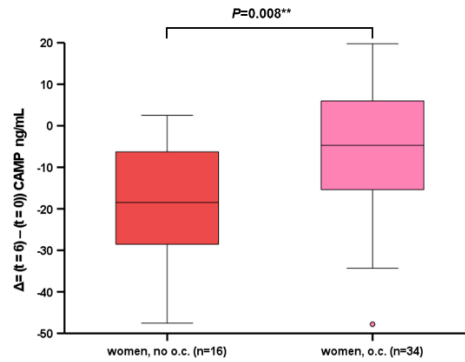

**Supplementary Figure S1: The decline of serum CAMP levels after oral lipid ingestion was significantly higher in women without oral contraception.**

The decline of CAMP serum levels ( $\Delta\text{CAMP} = (t = 6) - (t = 0)$ ) was determined for the subgroup of women. The decline of CAMP serum levels in women without oral contraception ( $n = 16$ ) is higher compared to CAMP serum levels than women taking oral contraceptives ( $n = 34$ ). CAMP serum concentrations were quantified by ELISA. The Mann-Whitney U-test was applied for calculation of statistical significance (\*\*  $p < 0.01$ ). o.c. oral contraception

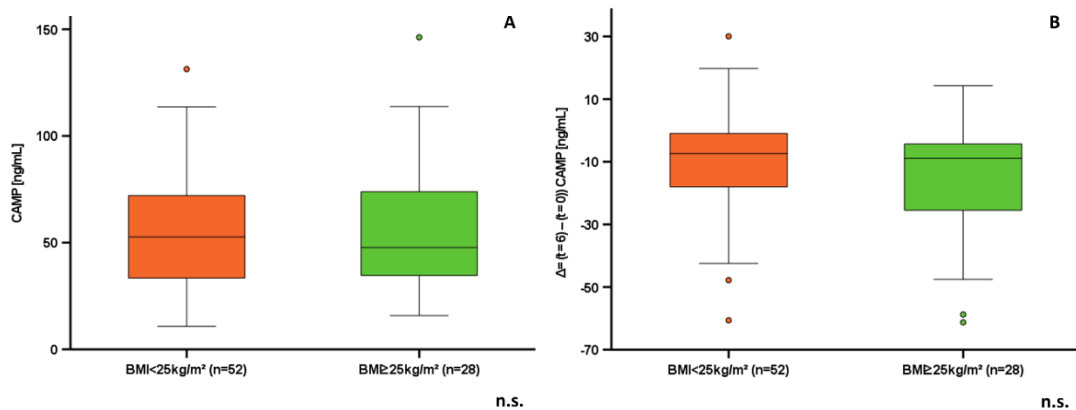

**Supplementary Figure S2: Comparing BMI categories (normal weight vs. overweight/obese), there was neither a significant difference in base-line CAMP serum concentrations (2A) nor in their dynamics after oral lipid ingestion (2B)**

Basal CAMP serum levels (2A) and the decline of CAMP serum levels ( $\Delta\text{CAMP}$ ) (2B) was measured in the subgroups of normal weight and overweight patients. There is no significant difference between these subgroups. CAMP serum concentrations were quantified by ELISA. The Mann-Whitney U-test was applied for calculation of statistical significance (n.s.= not significant);  $\Delta\text{CAMP} = (t = 6) - (t = 0)$

|                             | CAMP [ng/mL] |          |
|-----------------------------|--------------|----------|
|                             | <i>rho</i>   | <i>P</i> |
| skinfold [mm]               | -0.384       | <0.001** |
| excluded confounder         |              |          |
| age [y]                     | -0.304       | 0.006**  |
| + BMI [kg/m <sup>2</sup> ]  | -0.396       | <0.001** |
| + triglycerides [mg/dL]     | -0.401       | <0.001** |
| + total cholesterol [mg/dL] | -0.406       | <0.001   |
| + HDL cholesterol [mg/dL]   | -0.283       | 0.014*   |
| + LDL cholesterol [mg/dL]   | -0.282       | 0.015*   |
| + DPP-4 [pg/mL]             | -0.275       | 0.019*   |

**Supplementary Table S2: Significant and positive correlation of CAMP and skinfold persisted after exclusion of confounders**

Partial correlation analysis of CAMP and skinfold was performed. Confounders like age, BMI, triglycerides, total cholesterol, HDL cholesterol, LDL cholesterol or DPP-4 can be excluded. (\*  $p < 0.05$ , \*\*  $p < 0.01$ ).

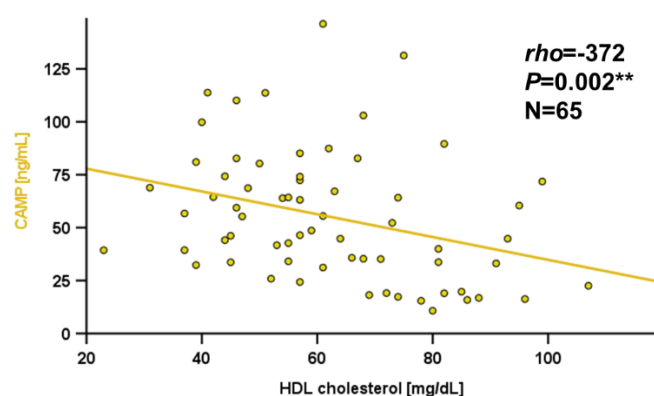

**Supplementary Figure S3: HDL cholesterol levels correlated negatively with CAMP serum concentrations in the subgroup of non-smokers**

Serum CAMP and HDL cholesterol levels are negatively correlated in the subgroup of non-smokers ( $n = 65$ ). CAMP serum concentrations were measured by ELISA. Spearman-rho test was applied for calculation of correlation coefficient and statistical significance (\*\*  $p < 0.01$ ).

|                             | CAMP [ng/mL] |          |
|-----------------------------|--------------|----------|
|                             | <i>rho</i>   | <i>P</i> |
| HDL cholesterol [mg/dL]     | -0.385       | <0.001** |
| excluded confounder         |              |          |
| age [y]                     | -0.345       | 0.002**  |
| + BMI [kg/m <sup>2</sup> ]  | -0.355       | 0.001**  |
| + triglycerides [mg/dL]     | -0.355       | 0.002**  |
| + total cholesterol [mg/dL] | -0.423       | <0.001** |
| + LDL cholesterol [mg/dL]   | -0.261       | 0.024*   |
| + DPP-4 [pg/mL]             | -0.240       | 0.039*   |

**Supplementary Table S3: Significantly and negatively correlation of CAMP and HDL cholesterol persisted after exclusion of confounders**

Partial correlation analysis of CAMP and HDL cholesterol was performed. Confounders like age, BMI, triglycerides, total cholesterol, LDL cholesterol, or DPP-4 can be excluded. (\*  $p < 0.05$ , \*\*  $p < 0.01$ ).

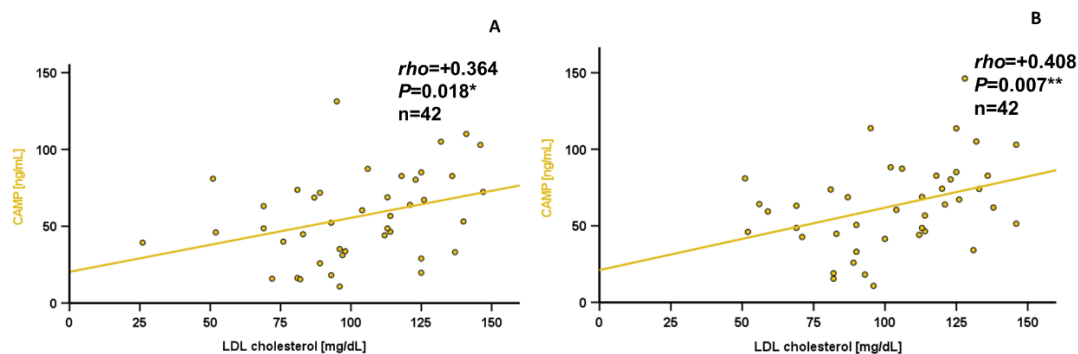

**Supplementary Figure S4: LDL cholesterol levels correlated positively with CAMP serum concentrations in the subgroup of patients with low waist-hip-ratio (A) and small skinfold (B)**

Serum CAMP and LDL cholesterol levels were positively correlated in the subgroups of patients with low waist-hip-ratio (A) ( $n = 42$ ) and small skinfold (B) ( $n = 42$ ). Low waist-hip-ratio was defined as lower than the median of the cohort ( $WHR < 0.84$ ). Small skinfold was defined as lower than the median of the cohort (skinfold  $< 10$ mm).

CAMP serum concentrations were measured by ELISA. Spearman-rho test was applied for calculation of correlation coefficient and statistical significance (\*  $p < 0.05$ , \*\*  $p < 0.01$ ).

|                           | CAMP [ng/mL] |        |
|---------------------------|--------------|--------|
|                           | $\rho$       | $P$    |
| Adiponectin [ $\mu$ g/mL] | -0.224       | 0.046* |
| confounder                |              |        |
| age [y]                   | -0.198       | 0.080  |
| BMI [kg/m <sup>2</sup> ]  | -0.198       | 0.080  |

**Supplementary Table S4: Partial correlation analyses revealed age or BMI as confounders of significant negative correlation of CAMP and adiponectin**

Partial correlation analysis of CAMP and adiponectin was performed. Confounders like age or BMI seem to be relevant confounders of significant negative correlation of CAMP and adiponectin. (\*  $p < 0.05$ )

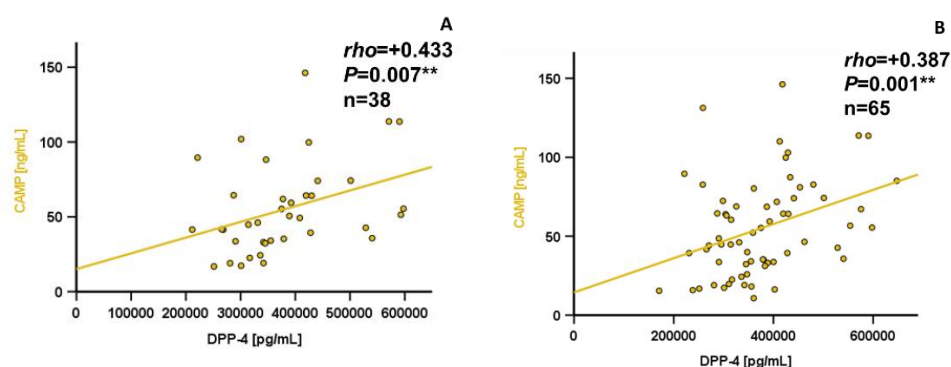

**Supplementary Figure S5: DPP-4 levels correlated positively with CAMP serum concentrations in the subgroup of patients with elevated waist-hip-ratio (A) and non-smokers (B)**

Serum CAMP and DPP-4 levels are positively correlated in the subgroups of patients with high waist-hip-ratio (A) ( $n = 38$ ) and non-smokers (B) ( $n = 65$ ). High waist-hip-ratio was defined as higher than the median of the cohort ( $WHR > 0.84$ ).

CAMP serum concentrations were measured by ELISA. Spearman-rho test was applied for calculation of correlation coefficient and statistical significance (\*\*  $p < 0.01$ ).

| <b>A</b>                                                                |                                        |          |
|-------------------------------------------------------------------------|----------------------------------------|----------|
| <b>metabolic parameters (t=0),<br/>n=80</b>                             | <b>CAMP [ng/mL] (t=0)</b>              |          |
|                                                                         | <i>rho</i>                             | <i>P</i> |
| BMI [kg/m <sup>2</sup> ]                                                | +0.063                                 | n.s.     |
| LDL cholesterol [mg/dL]                                                 | +0.188                                 | n.s.     |
| Total cholesterol [mg/dL]                                               | +0.023                                 | n.s.     |
| Triglycerides [mg/dL]                                                   | +0.195                                 | n.s.     |
| Glucose [mg/dL]                                                         | +0.126                                 | n.s.     |
| Insulin [mU/L]                                                          | -0.206                                 | n.s.     |
| <b>metabolic parameters (t=0),<br/>n=80</b>                             | <b>ΔCAMP [ng/mL] (t=(t=6) – (t=0))</b> |          |
| Skinfold [mm]                                                           | +0.127                                 | n.s.     |
| BMI [kg/m <sup>2</sup> ]                                                | -0.133                                 | n.s.     |
| HDL cholesterol [mg/dL]                                                 | +0.186                                 | n.s.     |
| LDL cholesterol [mg/dL]                                                 | -0.175                                 | n.s.     |
| Total cholesterol [mg/dL]                                               | -0.077                                 | n.s.     |
| Triglycerides [mg/dL]                                                   | -0.028                                 | n.s.     |
| Glucose [mg/dL]                                                         | -0.008                                 | n.s.     |
| Insulin [mU/L]                                                          | +0.170                                 | n.s.     |
| <b>Δmetabolic parameters<br/>(t=(t=6) – (t=0)), n=80</b>                | <b>ΔCAMP [ng/mL] (t=(t=6) – (t=0))</b> |          |
| HDL cholesterol [mg/dL]                                                 | -0.093                                 | n.s.     |
| LDL cholesterol [mg/dL]                                                 | -0.001                                 | n.s.     |
| Total cholesterol [mg/dL]                                               | +0.048                                 | n.s.     |
| Triglycerides [mg/dL]                                                   | +0.031                                 | n.s.     |
| Glucose [mg/dL]                                                         | -0.059                                 | n.s.     |
| Insulin [mU/L]                                                          | -0.042                                 | n.s.     |
| DPP-4 [pg/mL]                                                           | +0.009                                 | n.s.     |
| <b>B</b>                                                                |                                        |          |
| <b>metabolic parameters BMI<br/>&lt; 25kg/m<sup>2</sup> (t=0), n=52</b> | <b>CAMP [ng/mL] (t=0)</b>              |          |
| Skinfold [mm]                                                           | -0.260                                 | 0.062    |
| BMI [kg/m <sup>2</sup> ]                                                | +0.248                                 | n.s.     |
| Total cholesterol [mg/dL]                                               | +0.145                                 | n.s.     |
| Glucose [mg/dL]                                                         | +0.024                                 | n.s.     |
| Insulin [mU/L]                                                          | -0.099                                 | n.s.     |
| DPP-4 [pg/mL]                                                           | +0.254                                 | 0.069    |
| <b>metabolic parameters BMI<br/>&gt; 25kg/m<sup>2</sup> (t=0), n=28</b> | <b>CAMP [ng/mL] (t=0)</b>              |          |
| BMI [kg/m <sup>2</sup> ]                                                | -0.252                                 | n.s.     |
| HDL cholesterol [mg/dL]                                                 | -0.352                                 | 0.066    |
| Total cholesterol [mg/dL]                                               | -0.058                                 | n.s.     |
| Triglycerides [mg/dL]                                                   | -0.008                                 | n.s.     |
| Glucose [mg/dL]                                                         | +0.213                                 | n.s.     |

**Supplementary Table S5 Correlation analysis of CAMP and metabolic parameters**

CAMP serum concentrations were measured by ELISA. Spearman-rho test was applied for calculation of correlation coefficient and statistical significance (\*  $p < 0.05$ ). t = hours after oral lipid ingestion. A) total study cohort (n = 80); B) subgroup analyses: BMI < 25kg/m<sup>2</sup> (n = 52); BMI > 25kg/m<sup>2</sup> (n = 28); not significant results are shown; significant results are shown in Table 2. (n.s. = not significant)

| <b>bile acids (t=0), n=80</b>                              | <b>CAMP [ng/mL] (t=0)</b>      |          |
|------------------------------------------------------------|--------------------------------|----------|
|                                                            | <i>rho</i>                     | <i>P</i> |
| Total bile acids [nmol/L]                                  | +0.056                         | n.s.     |
| Free bile acids [nmol/L]                                   | +0.215                         | 0.056    |
| Glycine-conj. bile acids [nmol/L]                          | +0.028                         | n.s.     |
| <b>bile acids (t=0), n=80</b>                              | <b>ΔCAMP [ng/mL] (t=t6-t0)</b> |          |
| Total bile acids [nmol/L]                                  | +0.044                         | n.s.     |
| Free bile acids [nmol/L]                                   | -0.147                         | n.s.     |
| Glycine-conj. bile acids [nmol/L]                          | +0.058                         | n.s.     |
| <b>bile acids (t=0), n=80</b>                              | <b>ΔCAMP [ng/mL] (t=t2-t0)</b> |          |
| Total bile acids [nmol/L]                                  | +0.218                         | n.s.     |
| Free bile acids [nmol/L]                                   | -0.046                         | n.s.     |
| Glycine-conj. bile acids [nmol/L]                          | +0.186                         | n.s.     |
| <b>bile acids, BMI &lt; 25kg/m<sup>2</sup> (t=0), n=52</b> | <b>CAMP [ng/mL] (t=0)</b>      |          |
| Total bile acids [nmol/L]                                  | +0.233                         | n.s.     |
| Free bile acids [nmol/L]                                   | +0.204                         | n.s.     |
| Taurine-conj. bile acids [nmol/L]                          | -0.102                         | n.s.     |
| Glycine-conj. bile acids [nmol/L]                          | -0.240                         | n.s.     |
| <b>bile acids, BMI &gt; 25kg/m<sup>2</sup> (t=0), n=28</b> | <b>CAMP [ng/mL] (t=0)</b>      |          |
| Total bile acids [nmol/L]                                  | -0.240                         | n.s.     |
| Free bile acids [nmol/L]                                   | +0.233                         | n.s.     |

**Supplementary Table S6 Correlation analysis of CAMP and bile acids**

CAMP serum concentrations were measured by ELISA. Spearman rho test was applied for calculation of correlation coefficient and statistical significance. (\*  $p < 0.05$ ). t = hours after oral lipid ingestion. (significant results are shown in Table 3), n.s. not significant
